# Supplementary material for: A Novel Chloroplast Protein RNA Processing 8 Is Required for the Expression of Chloroplast Genes and Chloroplast Development in Arabidopsis thaliana
Source: PubMed Central journal article supplement (PMC8695849; doi:10.3389/fpls.2021.700975), 2021-12-09
Supplement: Table_1.pdf [file Table_1.pdf]

**Supplemental Table S1. Primers used in this study.**

| <b>Names</b>                                                          | <b>Primer sequence 5'→3' (forward / reverse)</b> |
|-----------------------------------------------------------------------|--------------------------------------------------|
| T-DNA left border primer LB3                                          | ATTTTGCCGATTTTCGGAAC                             |
| LP                                                                    | GGACCCTACATGGGCTTATTG                            |
| RP                                                                    | CAGAAACTCTTGATGGCTTGG                            |
| LPP (RP+LPP to check the hygromycin-resistant complementation plants) | TATTGATCTCATAGCCAGGCC                            |
| complementation F                                                     | GGTACCTTTCTCTATTACATCCTTCTATGG                   |
| complementation R                                                     | CTGCAGTCAGTTCAAAAATCTTCAATAGT                    |
| RT-PCR RP8-F                                                          | AGGAGCTTGATTCCTCATTGA                            |
| RT-PCR RP8-R                                                          | TTAGGGTCCTTAGCTTCGTG                             |
| qRT-PCR RP8-F                                                         | TCAAACCCATCATCTCCCTT                             |
| qRT-PCR RP8-R                                                         | GAGCCATAGTGTAACCTTCAGC                           |
| RT-PCR ACTIN2 F                                                       | TCTTCTCCGCTCTTTCTTTCC                            |
| RT-PCR ACTIN2 R                                                       | TCTTACAATTTCCCGCTCTGC                            |
| qRT-PCR ACTIN2 F                                                      | TTGAATCTCCGGCGACTTGA                             |
| qRT-PCR ACTIN2 R                                                      | CCAACATATGCATCCTTCTG                             |
| YFPF                                                                  | CTCGAGATGGCGAATTTACTGGAAACA                      |
| YFPR                                                                  | ACTAGTAGGTTTCTCATTCAAGAAGAGAT                    |
| RP8 PROTEIN F                                                         | GGTACCTGCGG AAGTAAAAAGCTCTGTT                    |
| RP8 PROTEIN R                                                         | AAGCTTTCAGTTCAAAAATCTTCAATA                      |
| psaA F for northern blot                                              | GCGAGCACCAGTTTGACTTG                             |
| psaA R for northern blot                                              | CCTACTGCAATAATTCTTGC                             |
| psbA F for northern blot                                              | ACAACATTGTAGCTGCTCAC                             |
| psbA R for northern blot                                              | CTAACACTAACGAATTATCC                             |
| psbB F for northern blot                                              | ATGGGTTTGCCTTGGTATCG                             |
| psbB R for northern blot                                              | ACAATTCCGTCTCCGTCTAC                             |
| petB F for northern blot                                              | GGTTCGAAGAACGTCTTGAG                             |
| petB R for northern blot                                              | AGGGACCAGAAATACCTTGC                             |
| atpB F for northern blot                                              | ATGAGAACAAATCCTACTAC                             |

|                               |                         |
|-------------------------------|-------------------------|
| atpB R for northern blot      | GCCTTCGCAGTAGCTTCATC    |
| rbcL F for northern blot      | TCCAACGCATAAATGGTTGG    |
| rbcL R for northern blot      | CTAAAGCAAGTGTTGGGTTC    |
| ClpP F for northern blot      | ATGATCCATCAACCCGCTAG    |
| ClpP R for northern blot      | TATTGAACCGCTACAAGATC    |
| rps11 F for northern blot     | AAACCTATATTAAGAATTGG    |
| rps11 R for northern blot     | TATACACGTCTTTTTTTAGG    |
| rpoA F for northern blot      | CGGACACTACAGTGGAAGTG    |
| rpoA R for northern blot      | TGAATACAGCATCGATAGG     |
| rpoB F for northern blot      | ATGCCTTATTTGCAAGACGG    |
| rpoB R for northern blot      | GATCGTAGTTCTCGAACAAG    |
| rpoC2 F for northern blot     | AATAATTCGCCAGATTCGGG    |
| rpoC2 R for northern blot     | AGTCACAAAATTCCCTGTGG    |
| Lhcb1 F for northern blot     | ATGGCCGCCTCAACAATGGCTC  |
| Lhcb1 R for northern blot     | TCACTTTCCGGGAACAAAGTTG  |
| atpC1 F for northern blot     | ATGGCTTGCTCTAATCTAACAA  |
| atpC1 R for northern blot     | GGAACATCGACATCATCGGTTT  |
| 23S rRNA F for northern blot  | GGAGTTGAAAATAAGCGTAGATC |
| 23S rRNA R for northern blot  | TACTACTTAGATGCTTTCAGCAG |
| 16S rRNA F for northern blot  | TTCATGGAGAGTTCGATCCTG   |
| 16S rRNA R for northern blot  | TACGGCTACCTTGTTACGACTTC |
| 4.5S rRNA F for northern blot | TCACGGCGAGACGAGCCGTTTAT |
| 4.5S rRNA R for northern blot | GTTCAAGTCTACCGGTCTGTTAG |
| 5S rRNA F for northern blot   | TATTCTGGTGTCTTAGGCGTAGA |
| 5S rRNA R for northern blot   | ATCCTGGCGTCGAGCTATTTTTC |
